# Supplementary material for: An internal electric field and interfacial S–C bonds jointly accelerate S-scheme charge transfer achieving efficient sunlight-driven photocatalysis
Source: Royal Society of Chemistry journal article supplement (doi:10.1039/d2ta08337j), 2022-01-01
Supplement: d2ta08337j1.pdf [file d2ta08337j1.pdf]

**An internal electric field and interfacial S-C bonds jointly accelerate S-scheme charge transfer achieving efficient sunlight-driven photocatalysis**

**Linlin Sun<sup>a</sup>, Xiaoshuo Liu<sup>b</sup>, Xiaohan Jiang<sup>a</sup>, Yibing Feng<sup>a</sup>, Xunlei Ding<sup>c</sup>, Nan Jiang<sup>d</sup>,  
Jigang Wang<sup>a,e,\*</sup>**

*<sup>a</sup>Jiangsu Key Laboratory of Advanced Metallic Materials, School of Materials Science and Engineering, Southeast University, Nanjing, 211189, PR China*

*<sup>b</sup>School of Energy and Power Engineering, North China Electric Power University, Baoding, 071003, PR China*

*<sup>c</sup>Institute of Clusters and Low Dimensional Nanomaterials, School of Mathematics and Physics, North China Electric Power University, Beijing 102206, PR China*

*<sup>d</sup>Collaborative Innovation Center for Cardiovascular Disease, Translational Medicine of Jiangsu, School of Pharmacy, Nanjing Medical University, Nanjing, 211166, PR China*

*<sup>e</sup>Xizang Engineering Laboratory for Water Pollution Control and Ecological Remediation, Xizang Minzu University, Xianyang, 712082, PR China*

---

\* Corresponding author Tel: +86-25-52090235;  
E-mail: wangjigang@seu.edu.cn.

## 22 1. Synthesis of flower-like ZIS and Sv-ZIS

23 The flower-like ZIS was synthesized by a simple one-step hydrothermal method.  
24 Specifically, CTAB (0.8 mM) was dispersed in deionized water (50 mL) and  $\text{ZnSO}_4 \cdot 7\text{H}_2\text{O}$  (1  
25 mM),  $\text{InCl}_3 \cdot 4\text{H}_2\text{O}$  (2 mM) and TAA (8 mM) were added in an orderly manner with stirring at  
26 room temperature for 40 min to obtain a clear solution. Subsequently, the mixed solution was  
27 poured into stainless steel autoclave maintained at 160 °C for 16 h in the oven. The reaction  
28 product was centrifuged, washed with water and ethanol, dried at 60 °C and fully ground to  
29 obtain a yellow powder named ZIS. The availability of (Sv-ZIS) was processed by  $\text{N}_2\text{H}_4 \cdot \text{H}_2\text{O}$ .  
30 Typically, ZIS (100 mg) was evenly dispersed in 50 mL of deionized water, and then  $\text{N}_2\text{H}_4 \cdot \text{H}_2\text{O}$   
31 (5 mL) was added. The reactants were transferred to the stainless steel autoclave, which reacted  
32 at 200 °C for 5 h. Finally, the precipitate was centrifuged, washed and dried to obtain Sv-ZIS.

## 33 2. Device characterizations

34 The crystal structure and phase composition of the as-prepared materials were detected by  
35 an X-ray diffractometer (XRD, D8-Discover, Germany) equipped with the Cu-  $\text{K}\alpha$  radiation  
36 source. The scanning range of 2 theta was 10~80° and the scanning speed was 5°/min. Electron  
37 paramagnetic resonance (EPR) spectra and electron spin resonance (ESR) spectra were detected  
38 on the Bruker A300-10/12 electron paramagnetic resonance spectrometer. Fourier-transform  
39 infrared spectroscopy (FT-IR, Nicolet iS10) was employed to study the functional group  
40 structure of samples. The morphology and microstructure of the photocatalysts were analyzed  
41 by scanning electronic microscopy (SEM, Navo Nano SEM450) and transmission electron  
42 microscopy (TEM, Talos F200X), respectively. High-resolution transmission electron  
43 microscopy (HRTEM) images, selected area electron diffraction (SAED) patterns, mapping  
44 images and energy dispersive spectroscopy (EDS) images corresponding to Sv-ZIS/CN were

45 acquired from TEM instruments. The elemental valence and chemical bond structure were  
46 measured by X-ray photoelectron spectroscopy (XPS) with the model of ESCALAB 250xi  
47 (America) electron spectrometer. The optical properties were estimated by a Cary 5000 UV–  
48 vis–NIR spectrophotometer (Varian) equipped with an integrating sphere (diameter=110 mm).  
49 Photoluminescence (PL) spectra were measured with an FSL1000 fluorescence  
50 spectrophotometer (Edinburgh Instruments Ltd). N<sub>2</sub> adsorption–desorption isotherms were  
51 examined using the Brunauer–Emmett–Teller method on a Micromeritics ASAP 2020 HD88  
52 instrument. The UV–vis spectrophotometer (Agilent Cary 8454) was used to measure the  
53 absorbance of tetracycline and H<sub>2</sub>O<sub>2</sub> production.

### 54 **3. Photo-electrochemical tests**

55 The photochemical properties of the photocatalysts were measured on an electrochemical  
56 workstation (CHI 660E, Shanghai, China) using a standard three-electrode system. Platinum  
57 plate, saturated Ag/AgCl, as-prepared photocatalyst were applied to the counter electrode,  
58 reference electrode and working electrode, respectively. The working electrode was prepared by  
59 the following steps. In general, 5 mg powder samples were ultrasonically dispersed in 1 mL  
60 alcohol for 30 min, followed by 40  $\mu$ L Nafion solution for another 30 min. Afterward, 20  $\mu$ L of  
61 the above suspended droplets were placed on indium tin oxide (ITO) glass with an area of 1 cm<sup>2</sup>  
62 and then dried overnight at room temperature. Sodium sulfate (Na<sub>2</sub>SO<sub>4</sub>, 0.5 M) is selected as an  
63 electrolyte in a quartz vessel. The transient photocurrent response (TPR) was measured using a  
64 Xenon lamp (with 420 nm filter) as the light source.

### 65 **4. Density functional theory (DFT) calculations**

66 DFT was performed using the Vienna ab initio simulation package (VASP) [1], in which

67 projector augmented wave potentials are accepted to describe the valence electrons, and the  
68 Perdew-Burke-Ernzerhof functional is utilized to describe exchange-correlation interactions of  
69 electrons [2-3]. The Brillouin zone is sampled using a  $3 \times 3 \times 1$   $\Gamma$ -centered k-point, and the  
70 kinetic cut-off energy for the plane-wave basis set is 400 eV, with all calculations taking  
71 dispersion corrections into consideration using Grimme's DFT-D3 method [4]. For multi-  
72 layered Sv-ZIS, the bottom three layers atoms have been frozen to simulate the reaction surface,  
73 and when the maximum forces on the relaxed atoms are all less than 0.05 eV/Å, the structural  
74 optimization task is considered successful. Besides, a vacuum layer at least 15 Å is set up to  
75 avoid the mirror interaction of adjacent cells.

## 76 5. Characterization

77 **Fig. S1.** The standard curve of H<sub>2</sub>O<sub>2</sub> concentration.

78 **Fig. S2.** SEM images of (a) Sv-ZIS; (b) 3DA-CN; (c, d) Sv-ZIS/CN.

79 **Fig. S3.** The top view optimized structure model of Sv-ZIS/CN.

80 **Fig. S4.** N<sub>2</sub> adsorption-desorption isotherms of 3DA-CN, Sv-ZIS and Sv-ZIS/CN.

81 **Fig. S5.** The transient photocurrent response of Sv-ZIS and ZIS.

82 **Fig. S6.** Time-concentration plots of Sv-ZIS and ZIS for TC photocatalytic degradation.

83 **Fig. S7.** The cycle degradation experiments of Sv-ZIS/CN.

84 **Fig. S8.** The XRD patterns of Sv-ZIS/CN before and after photocatalytic degradation reaction.

85 **Fig. S9.** (a, b) TEM images of Sv-ZIS/CN after four cycles of experiments.

86

87

88

89

90

91  
92  
93

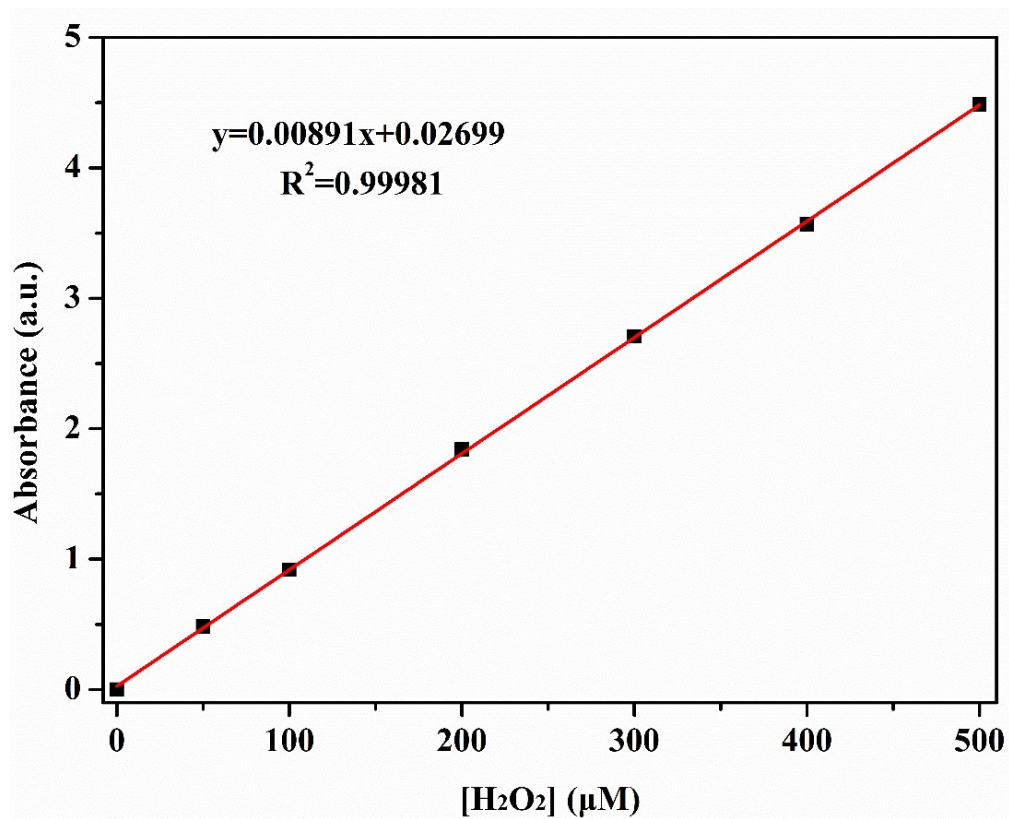

94  
95

**Fig. S1.** The standard curve of  $H_2O_2$  concentration.

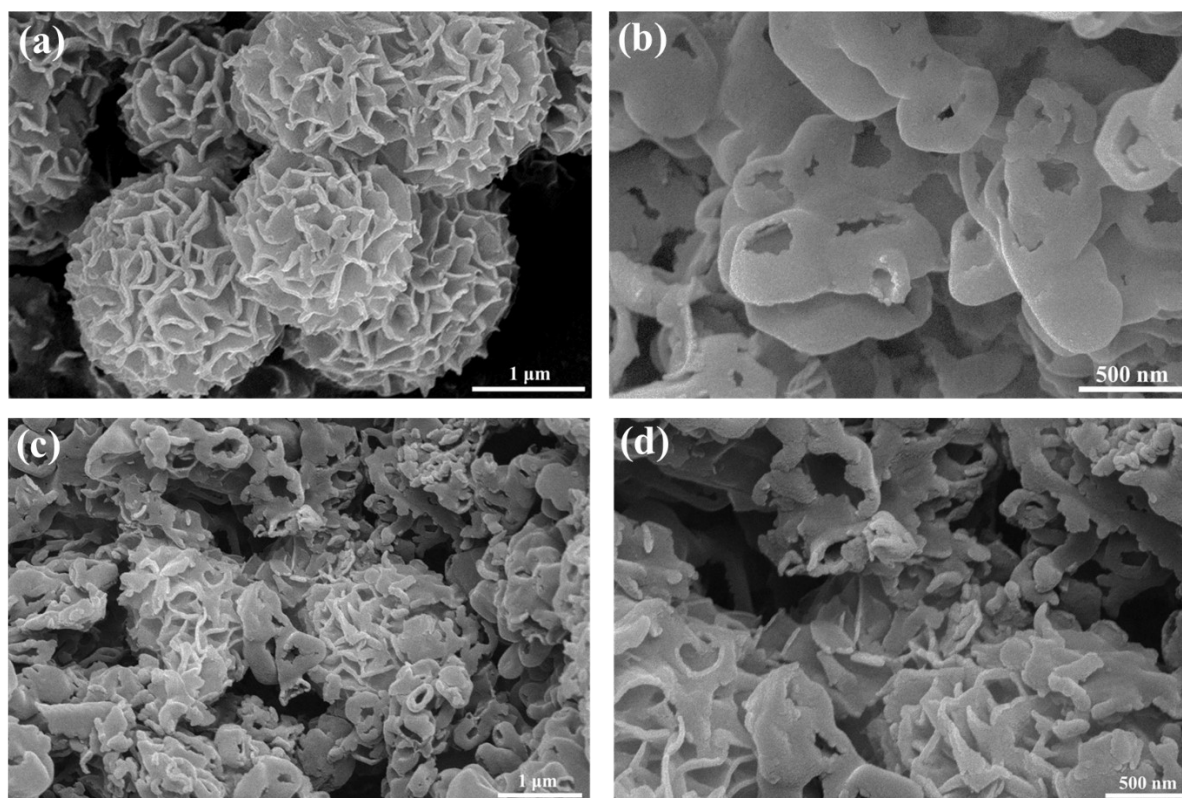

96

97

**Fig. S2.** SEM images of (a) Sv-ZIS; (b) 3DA-CN; (c, d) Sv-ZIS/CN.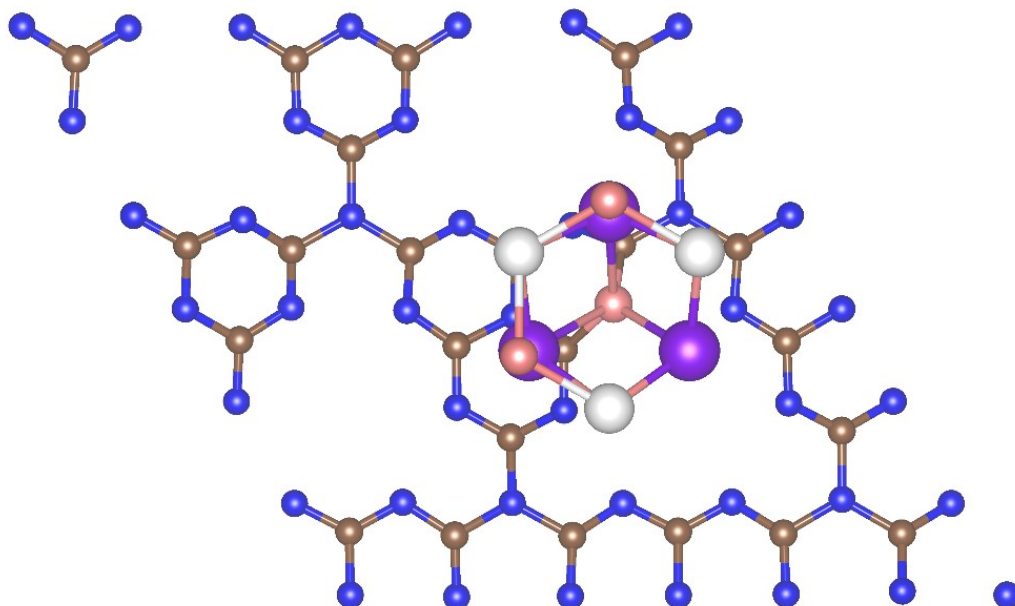

98

99

**Fig. S3.** The top view optimized structure model of Sv-ZIS/CN.

100

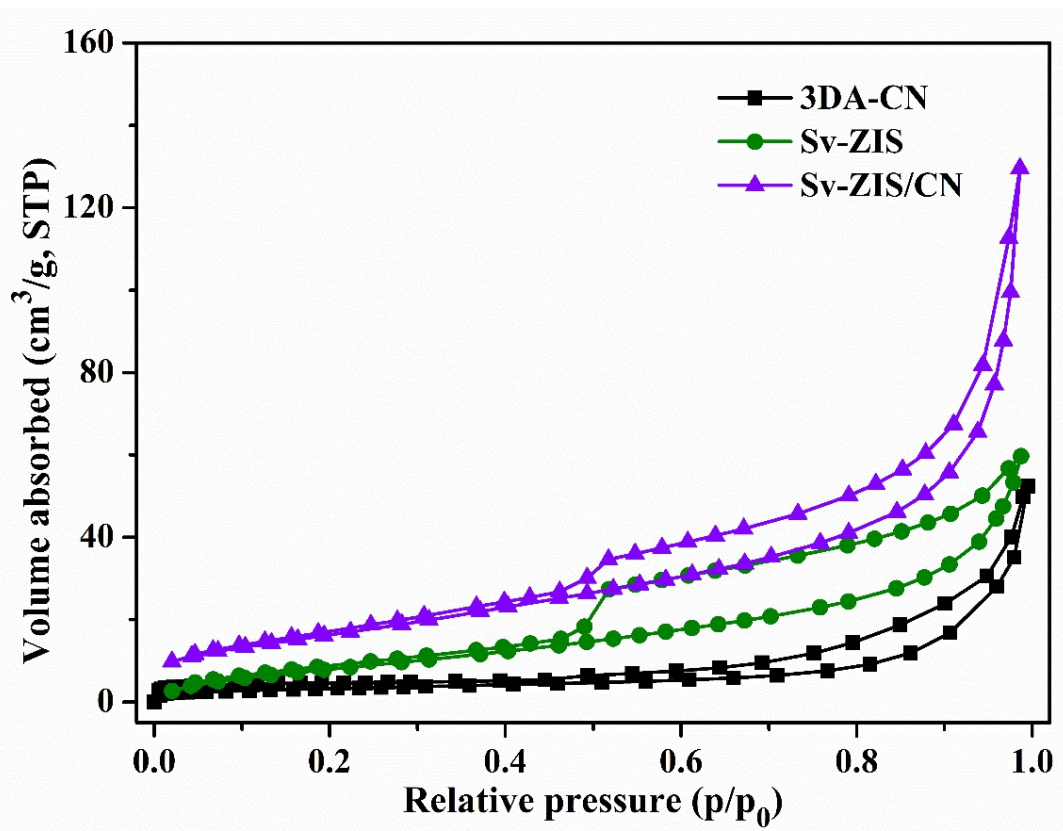

101

102

**Fig. S4.** N<sub>2</sub> adsorption-desorption isotherms of 3DA-CN, Sv-ZIS and Sv-ZIS/CN.



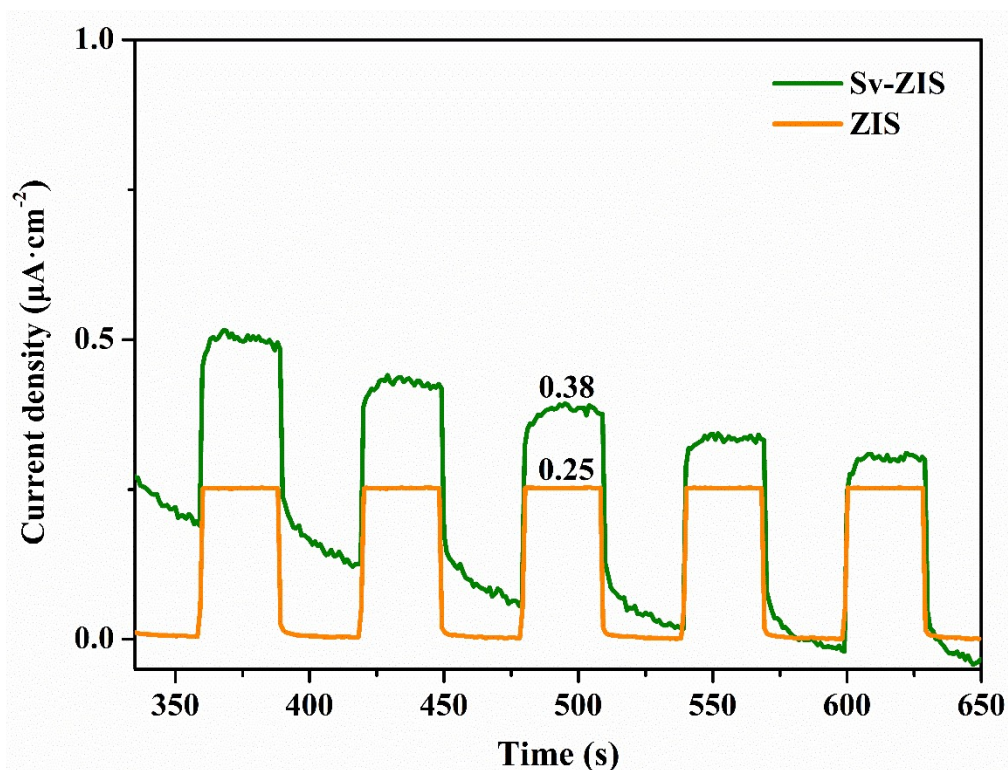

**Fig. S5.** The transient photocurrent response of Sv-ZIS and ZIS.

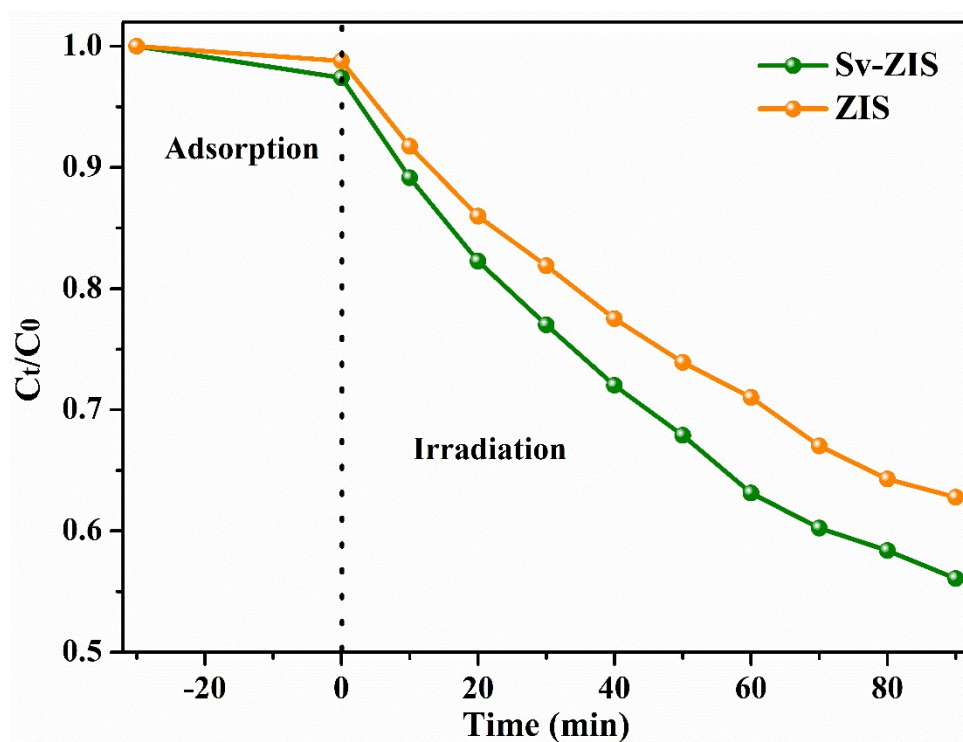

**Fig. S6.** Time-concentration plots of Sv-ZIS and ZIS for TC photocatalytic degradation.

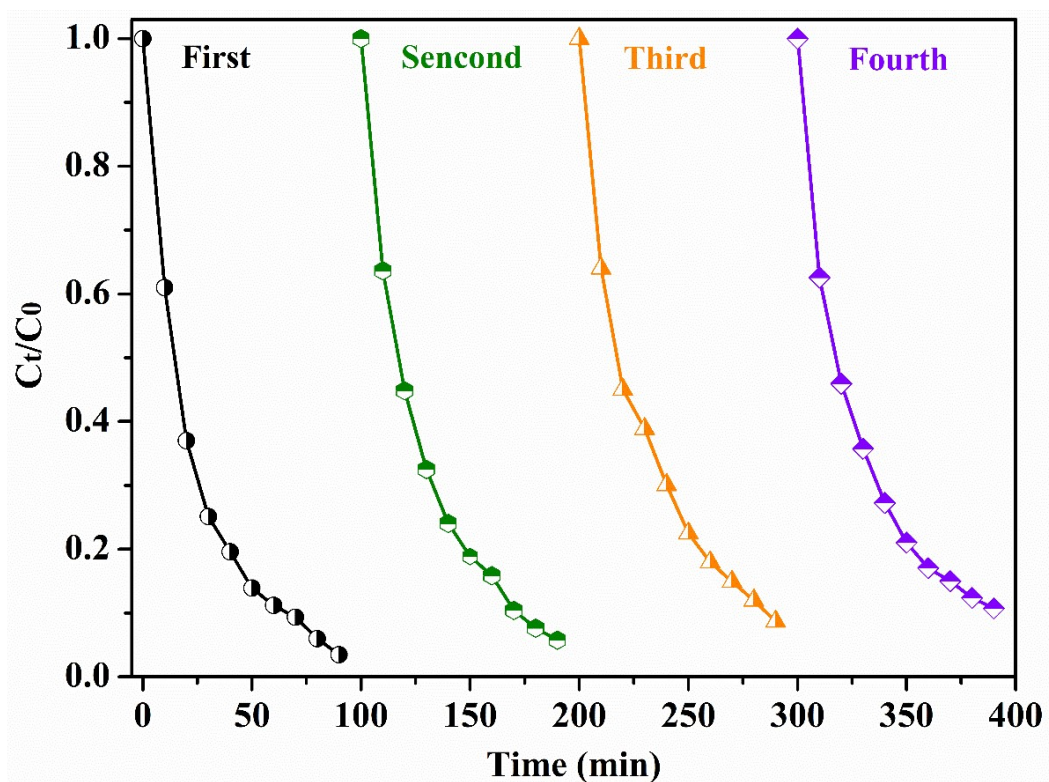

Fig. S7. The cycle degradation experiments of 4Sv-ZIS/CN.

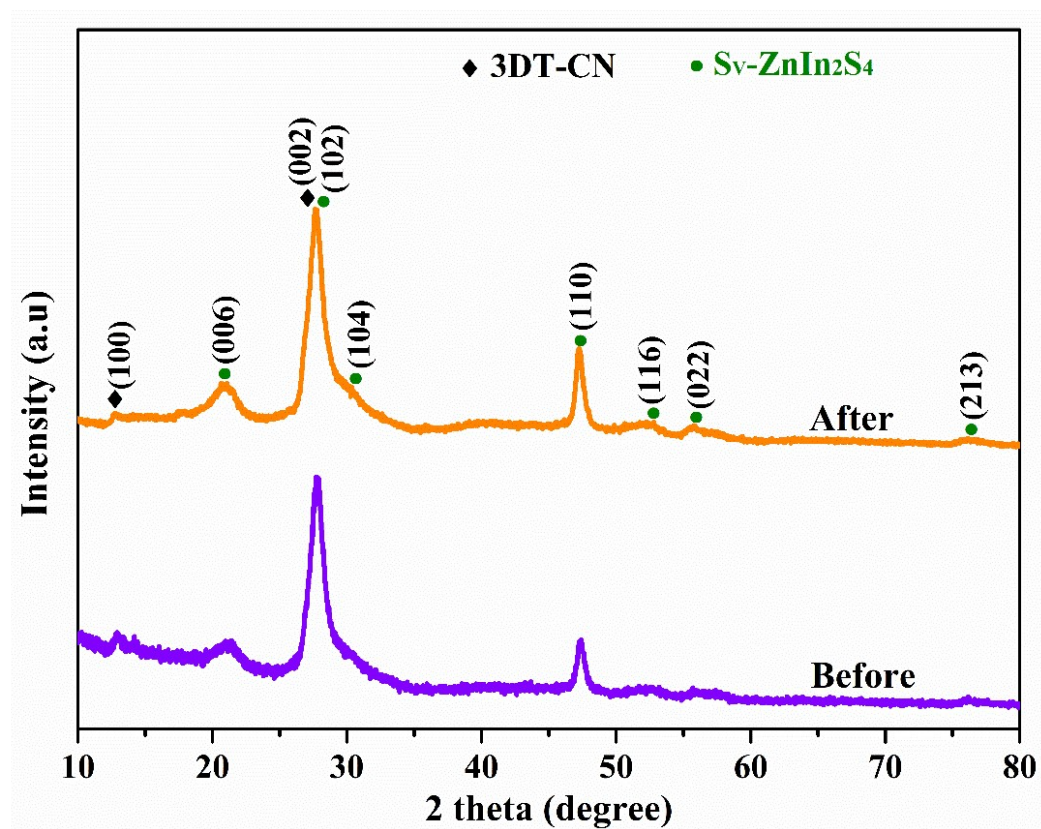

Fig. S8. The XRD patterns of 4Sv-ZIS/CN before and after photocatalytic degradation reaction.



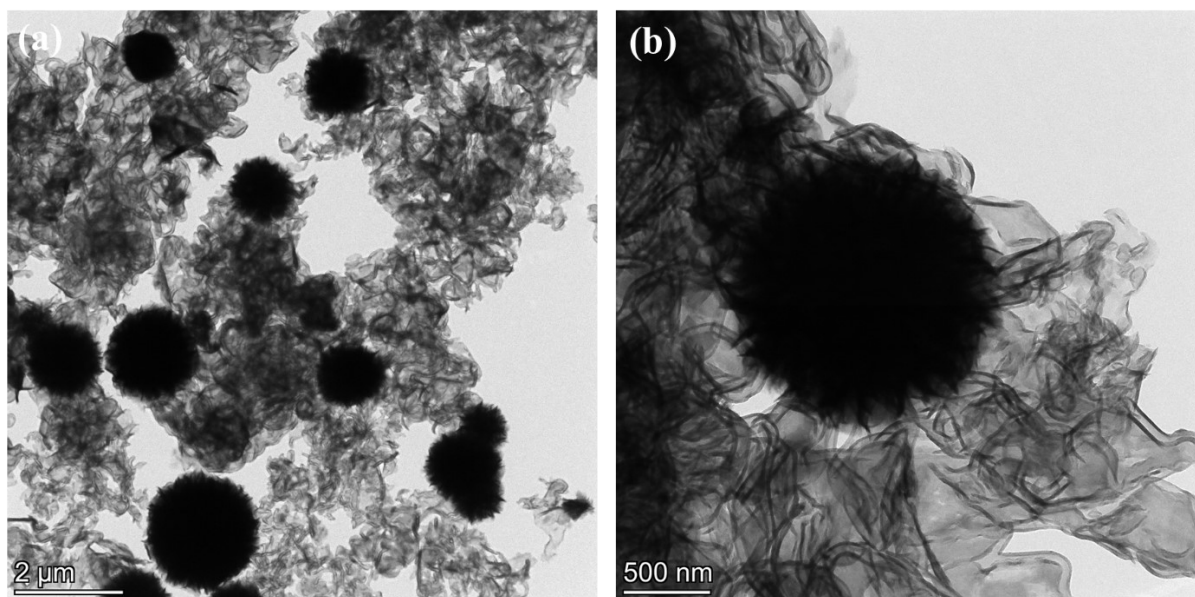

**Fig. S9.** (a, b) TEM images of 4Sv-ZIS/CN after four cycles of experiments.

## 6. Table of contents:

**Table S1.** Specific surface area of 3DA-CN, Sv-ZIS and Sv-ZIS/CN.

**Table S1.** Specific surface area of 3DA-CN, Sv-ZIS and Sv-ZIS/CN.

| Products  | $S_{\text{BET}} (\text{m}^2 \cdot \text{g}^{-1})$ |
|-----------|---------------------------------------------------|
| 3DA-CN    | 93.47                                             |
| Sv-ZIS    | 191.40                                            |
| Sv-ZIS/CN | 137.52                                            |

## 7. References

- [1] G. Kresse, J. Furthmüller, *Comput. Mater. Sci.*, 1996, **6** 15–50.
- [2] J.P. Perdew, K. Burke, M. Ernzerhof, *Phys. Rev. Lett.*, 1996, **77**, 3865–3868.
- [3] G. Kresse, D. Joubert, *Phys. Rev. B*, 1999, **59**, 1758–1775.
- [4] S. Grimme, J. Antony, S. Ehrlich, H. Krieg, *J. Chem. Phys.*, 2010, **132** 154104.
